# Supplementary material for: Nanozyme linked multi-array gas driven sensor for real-time quantitative detection of Group A streptococcus
Source: Royal Society of Chemistry journal article supplement (doi:10.1039/d4an00787e), 2024-01-01
Supplement: d4an00787e1.pdf [file d4an00787e1.pdf]

## **Nanozyme linked multi-array gas driven sensor for real-time quantitative detection of *Group A streptococcus***

Qi Wang<sup>1†</sup>, Pei Liu<sup>2†</sup>, Ke Xiao<sup>3</sup>, Wenying Zhou<sup>1</sup>, Jinfeng Li<sup>4\*</sup>, Yun Xi<sup>1\*</sup>

<sup>1</sup> Department of Laboratory Medicine, The Third Affiliated Hospital, Sun Yat-sen University, Guangzhou 510630, China;

<sup>2</sup> Department of Neurosurgery, Ningguo People's Hospital, Xuancheng 242300, China;

<sup>3</sup> Department of Laboratory Medicine, The Second Hospital of Chinese Medicine in Guangdong, Guangzhou, 510095, China;

<sup>4</sup> Shenzhen Bao'an District Central Blood Station, Shenzhen 518101, China.

† These authors contributed equally to this work.

\* To whom correspondence should be addressed: xiyun1993@163.com (Y Xi); or shandongli518@126.com (J Li)

### **Contents**

**Fig. S1.** Assembly of NLMAGS components.

**Fig. S2.** Stability of NLMAGS.

**Fig. S3.** The influence of different environmental temperatures on determination.

**Fig. S4.** Optimization.

**Fig. S5.** Schematic and sensitivity of Au@Pt@PdNPs-LFIA for detection of GAS.

**Fig. S6.** The optimization of mAb1 concentration coated in ELISA.

**Fig. S7.** The optimization of mAb2-HRP dilution times in ELISA.

**Fig. S8.** Sensitivity of the ELISA for detecting GAS.

**Table S1.** The internal diameter and external diameter of valve and capillary.

**Table S2.** Different concentrations of *GAS* standard were detected using NLMAGS.

**Table S3.** As of the completion date (03-Jun-2024) of this work, the cost of materials for assembly of NLMAGS.

**Table S4.** The detection results of spiked samples between ELISA and NLMAGS.

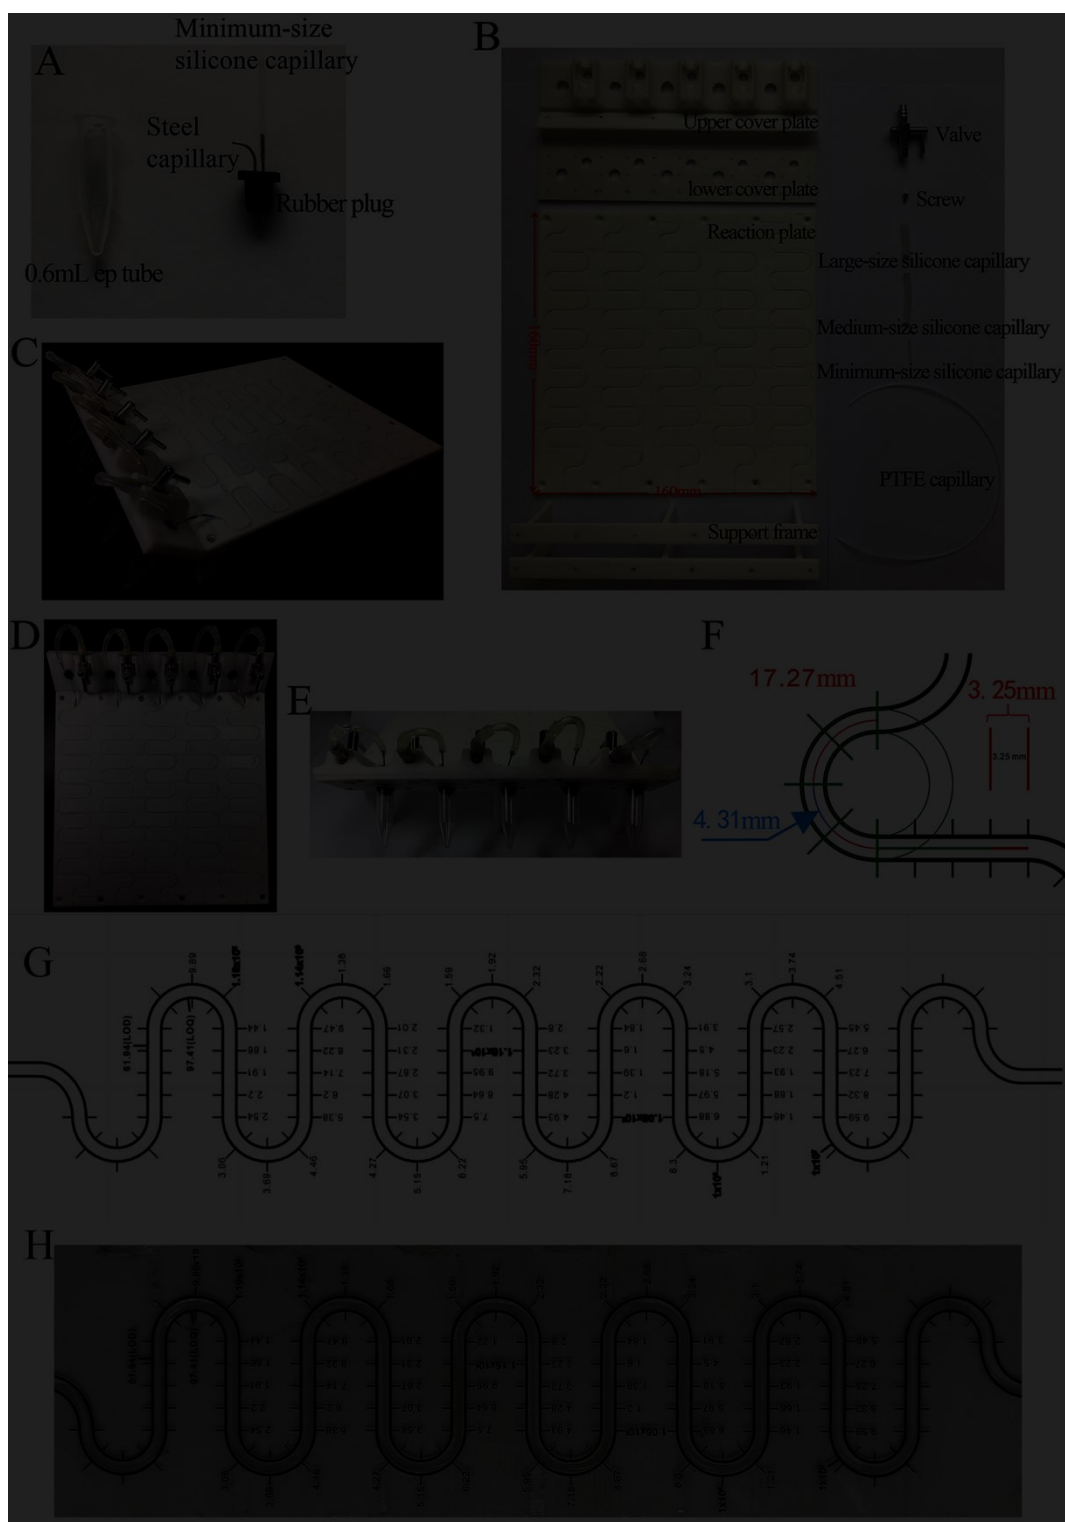

**Fig. S1.** Assembly of NLMAGS components. (A) Detailed components of the reaction device; (B) Detailed components of the result reading device; (C) The side view of NLMAGS; (D) The vertical view of NLMAGS; (E) The front view of NLMAGS; (F) The size of the reading ruler; (G) The design of reading ruler; (H) The

image of reading ruler.

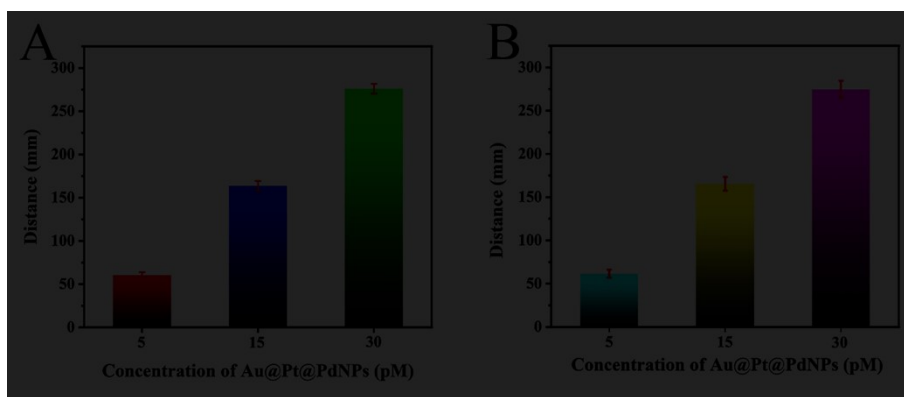

**Fig. S2.** Stability of NLMAGS. (A) The intra-assay of the NLMAGS (n=5); (B) The inter-assay of the NLMAGS (n=5).

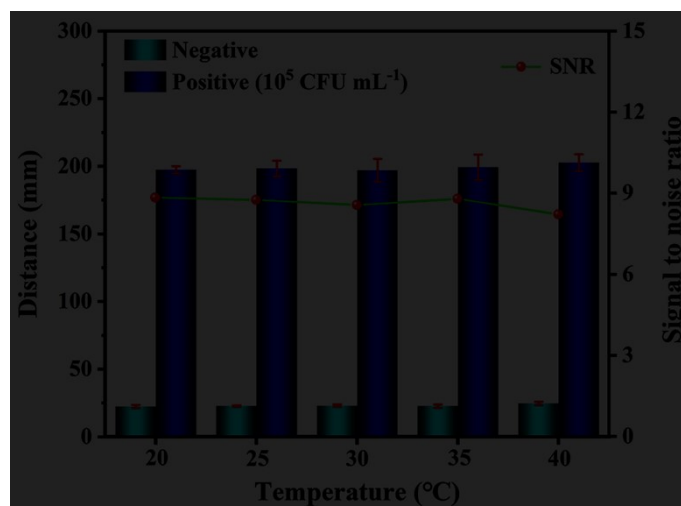

**Fig. S3.** The influence of different environmental temperatures on determination.

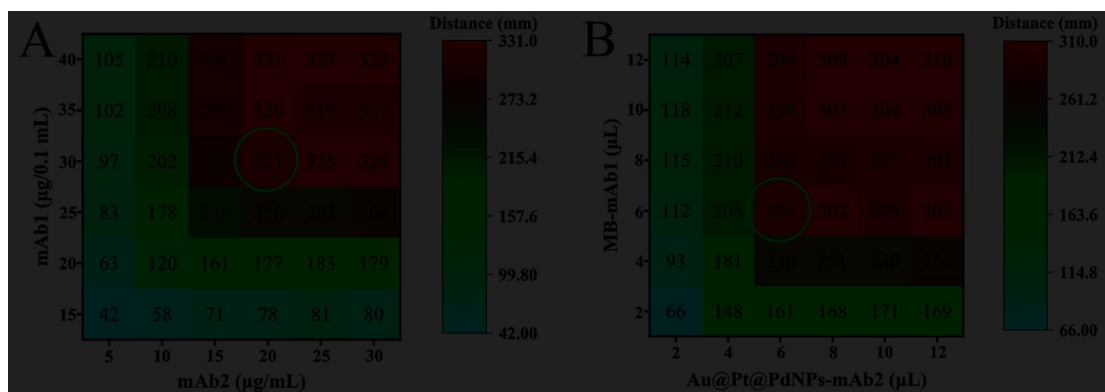

**Fig. S4.** Optimization. **(A)** Different amount of mAb1 (15, 20, 25, 30, 35, or 40 µg) labeled 0.1 mL magnetic beads and different amount of mAb2 (5, 10, 15, 20, 25, or 30 µg) labeled 1 mL Au@Pt@PdNPs were randomly paired for detecting *GAS* ( $10^7$  CFU mL<sup>-1</sup>); **(B)** Different usage of MB-mAb1 (2, 4, 6, 8, 10, 12 µL) and Au@Pt@PdNPs-mAb2 (2, 4, 6, 8, 10, 12 µL) were randomly paired for detecting *GAS* ( $10^7$  CFU mL<sup>-1</sup>).

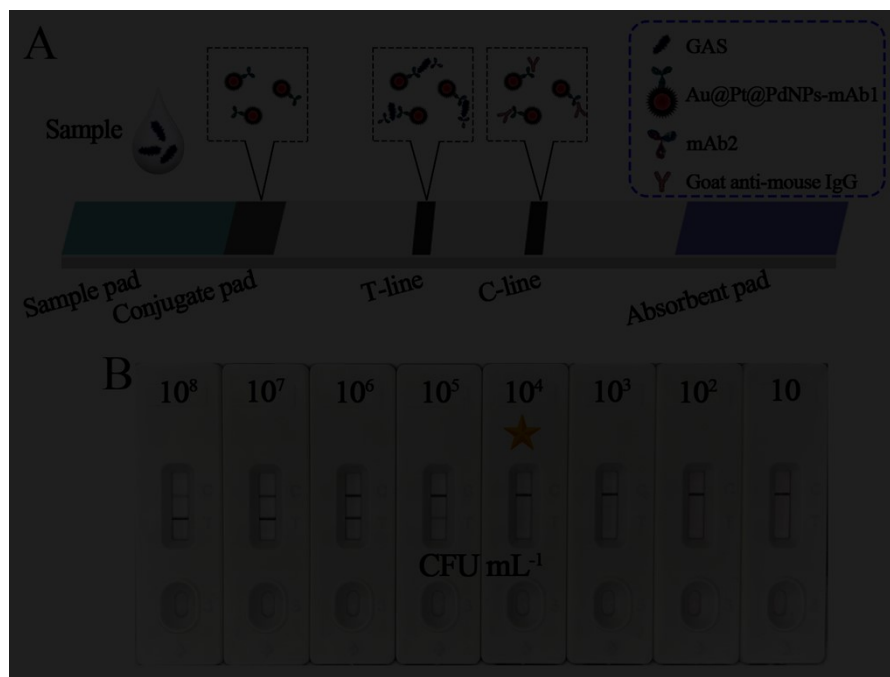

**Fig. S5.** Schematic and sensitivity of Au@Pt@PdNPs-LFIA for detection of *GAS*. **(A)** The Schematic of Au@Pt@PdNPs-LFIA; **(B)** The sensitivity of Au@Pt@PdNPs-LFIA for detection of *GAS*.

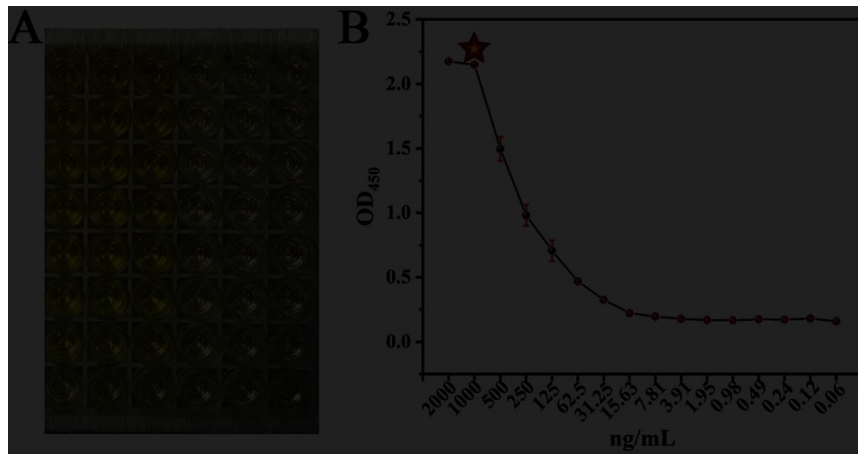

**Fig. S6.** The optimization of mAb1 coating concentration in ELISA. (A) ELISA coated with different concentrations (0.06-2000 ng/mL) of mAb1 for *GAS* ( $10^7$  CFU mL<sup>-1</sup>) detection. (B) The OD values corresponding to the different concentration (0.06-2000 ng/mL) of mAb1 coated in ELISA.

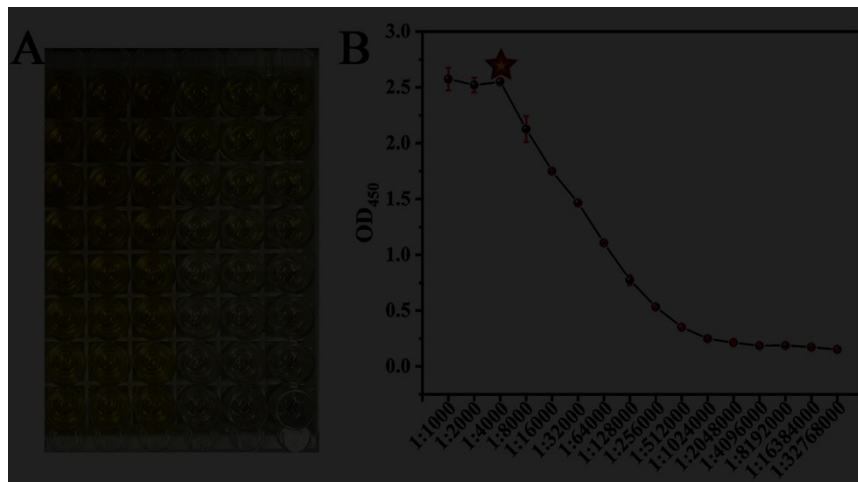

**Fig. S7.** The optimization of mAb2-HRP dilution times in ELISA. (A) ELISA worked with different dilution times (1000- 32768000 times) of mAb2-HRP for *GAS* ( $10^7$  CFU mL<sup>-1</sup>) detection. (B) The OD values corresponding to the different dilution times (1000- 32768000 times) of mAb2-HRP used in ELISA.



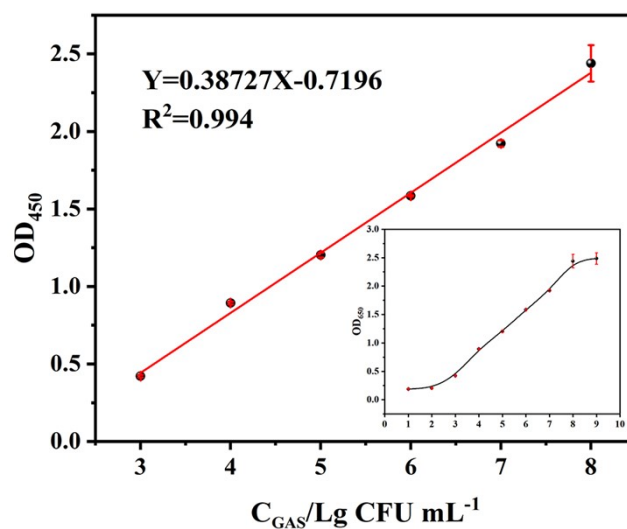

**Fig. S8.** The quantitative curve of ELISA.

**Table S1.** The internal diameter and external diameter of the valve and capillary

|                                                 | Internal diameter<br>(mm) | External diameter<br>(mm) |
|-------------------------------------------------|---------------------------|---------------------------|
| <b>Valve</b>                                    | 3.5                       | 4                         |
| <b>Large-size silicone capillary</b>            | 2.00                      | 4.00                      |
| <b>Medium-size silicone capillary</b>           | 1.00                      | 3.00                      |
| <b>Minimum-size silicone capillary</b>          | 0.50                      | 1.50                      |
| <b>Steel capillary</b>                          | 0.65                      | 0.80                      |
| <b>PTFE (polytetrafluoroethylene) capillary</b> | 0.50                      | 0.90                      |

**Table S2.** Different concentrations of *GAS* standard were detected using NLMAGS

|                       | <b>Test 1<br/>(mm)</b> | <b>Test 2<br/>(mm)</b> | <b>Test 3<br/>(mm)</b> | <b>Average<br/>(mm)</b> | <b>SD</b> | <b>CV (%)</b> |
|-----------------------|------------------------|------------------------|------------------------|-------------------------|-----------|---------------|
| <b>Negative</b>       | 17                     | 18                     | 20                     | 18.33                   | 1.25      | 6.8           |
| <b>10</b>             | 19                     | 20                     | 21                     | 20                      | 0.82      | 4.08          |
| <b>10<sup>2</sup></b> | 40                     | 35                     | 34                     | 36.33                   | 2.62      | 7.22          |
| <b>10<sup>3</sup></b> | 92                     | 87                     | 78                     | 85.67                   | 5.79      | 6.76          |
| <b>10<sup>4</sup></b> | 162                    | 148                    | 147                    | 152.33                  | 6.85      | 4.5           |
| <b>10<sup>5</sup></b> | 192                    | 210                    | 215                    | 205.67                  | 9.88      | 4.8           |
| <b>10<sup>6</sup></b> | 265                    | 249                    | 245                    | 253                     | 8.64      | 3.42          |
| <b>10<sup>7</sup></b> | 303                    | 302                    | 282                    | 295.67                  | 9.67      | 3.27          |
| <b>10<sup>8</sup></b> | 340                    | 317                    | 332                    | 329.67                  | 9.53      | 2.89          |
| <b>10<sup>9</sup></b> | 347                    | 331                    | 346                    | 341.33                  | 7.32      | 2.14          |

**Average:** Average of movement distance (mm) detected using the NLMAGS (n=3).

**SD:** Standard deviation of movement distance (mm) detected using the NLMAGS

(n=3). (**CV**, Coefficient of Variation) = (SD/ Average)\*100%.

**Table S3.** As of the completion date (03-Jun-2024) of this work, the cost of materials

for assembly of NLMAGS.

| <b>Reusable material</b>        | <b>Cost (\$) /test</b> | <b>One-time material</b> | <b>Cost (\$) /test</b> |
|---------------------------------|------------------------|--------------------------|------------------------|
| 3D printing consumables         | 0.2                    | PTFE capillary           | 0.06                   |
| Valve                           | 0.43                   | Monocloning antibody     | 0.2                    |
| Large-size silicone capillary   | 0.002                  | Magnetic bead            | 0.1                    |
| Medium-size silicone capillary  | 0.002                  | Au@Pt@PdNPs              | 0.02                   |
| Minimum-size silicone capillary | 0.001                  | Others                   | 0.1                    |
| Steel capillary                 | 0.02                   | <b>Total</b>             | <b>0.48</b>            |
| Rubber plug                     | 0.23                   |                          |                        |
| Reading ruler (Film material)   | 0.2                    |                          |                        |
| <b>Total</b>                    | <b>1.085</b>           |                          |                        |

**Table S4.** The detection results of spiked samples between ELISA and NLMAGS

| Sample number | ELISA measurement (n=3)           |                                   |                                   |                                    |      |           | NLMAGS measurement (n=3)          |                                   |                                   |                                    |       |           |
|---------------|-----------------------------------|-----------------------------------|-----------------------------------|------------------------------------|------|-----------|-----------------------------------|-----------------------------------|-----------------------------------|------------------------------------|-------|-----------|
|               | Test 1<br>(CFU mL <sup>-1</sup> ) | Test 2<br>(CFU mL <sup>-1</sup> ) | Test 3<br>(CFU mL <sup>-1</sup> ) | Average<br>(CFU mL <sup>-1</sup> ) | SD   | CV<br>(%) | Test 1<br>(CFU mL <sup>-1</sup> ) | Test 2<br>(CFU mL <sup>-1</sup> ) | Test 3<br>(CFU mL <sup>-1</sup> ) | Average<br>(CFU mL <sup>-1</sup> ) | SD    | CV<br>(%) |
| 1             | 29458                             | 31157                             | 28375                             | 29663                              | 1145 | 3.86      | 28000                             | 32000                             | 32300                             | 30767                              | 1960  | 6.37      |
| 2             | 9387                              | 9528                              | 10463                             | 9793                               | 477  | 4.88      | 9950                              | 11500                             | 11500                             | 10983                              | 731   | 6.65      |
| 3             | 158236                            | 153565                            | 165898                            | 159233                             | 5084 | 3.19      | 184000                            | 160000                            | 184000                            | 176000                             | 11314 | 6.43      |
| 4             | 1023                              | 981                               | 1161                              | 1055                               | 77   | 7.29      | 1140                              | 1140                              | 1380                              | 1220                               | 113   | 9.27      |
| 5             | 1422                              | 1589                              | 1603                              | 1538                               | 82   | 5.35      | 1380                              | 1660                              | 1380                              | 1473                               | 132   | 8.96      |
| 6             | 30785                             | 31956                             | 29482                             | 30741                              | 1010 | 3.29      | 32300                             | 28000                             | 32300                             | 30867                              | 2027  | 6.57      |
| 7             | 84629                             | 84051                             | 78104                             | 82261                              | 2949 | 3.59      | 86700                             | 86700                             | 105000                            | 92800                              | 8627  | 9.3       |
| 8             | 2493                              | 2526                              | 2154                              | 2391                               | 168  | 7.03      | 3070                              | 2670                              | 3070                              | 2937                               | 189   | 6.42      |
| 9             | 1653                              | 1733                              | 1508                              | 1631                               | 93   | 5.71      | 1140                              | 1380                              | 1140                              | 1220                               | 113   | 9.27      |
| 10            | 17453                             | 16298                             | 16949                             | 16900                              | 473  | 2.8       | 13200                             | 15900                             | 15900                             | 15000                              | 1273  | 8.49      |
| 11            | 2519                              | 2632                              | 2841                              | 2664                               | 133  | 5.01      | 2670                              | 3070                              | 3540                              | 3093                               | 356   | 11.49     |

|    |          |          |          |          |        |      |          |         |          |          |        |       |
|----|----------|----------|----------|----------|--------|------|----------|---------|----------|----------|--------|-------|
| 12 | 4418     | 4917     | 4537     | 4624     | 213    | 4.6  | 4270     | 5150    | 5150     | 4857     | 415    | 8.54  |
| 13 | 55813    | 59640    | 60119    | 58524    | 1927   | 3.29 | 59500    | 59500   | 71800    | 63600    | 5798   | 9.12  |
| 14 | 7920139  | 8014752  | 7613501  | 7849464  | 171264 | 2.18 | 7230000  | 7230000 | 8320000  | 7593333  | 513831 | 6.77  |
| 15 | 21368907 | 23165889 | 21586916 | 22040571 | 800682 | 3.63 | 11600000 | 9590000 | 11600000 | 10930000 | 947523 | 8.67  |
| 16 | 79264    | 74645    | 79158    | 77689    | 2153   | 2.77 | 71800    | 86700   | 86700    | 81733    | 7024   | 8.59  |
| 17 | 1182     | 1234     | 1035     | 1150     | 84     | 7.33 | 1380     | 1140    | 1380     | 1300     | 113    | 8.7   |
| 18 | 640675   | 632238   | 562467   | 611793   | 35049  | 5.73 | 597000   | 688000  | 597000   | 627333   | 42898  | 6.84  |
| 19 | 26033    | 26846    | 28459    | 27113    | 1008   | 3.72 | 23200    | 23200   | 28000    | 24800    | 2263   | 9.12  |
| 20 | 37156    | 39578    | 36412    | 37715    | 1352   | 3.58 | 32300    | 37200   | 42800    | 37433    | 4290   | 11.46 |
| 21 | 448      | 371      | 465      | 428      | 41     | 9.56 | 538      | 369     | 446      | 451      | 69     | 15.32 |
| 22 | 42962    | 41194    | 44646    | 42934    | 1409   | 3.28 | 42800    | 42800   | 49300    | 44967    | 3064   | 6.81  |
| 23 | 5929     | 6847     | 6457     | 6411     | 376    | 5.87 | 7500     | 6220    | 7500     | 7073     | 603    | 8.53  |
| 24 | 84256    | 91757    | 89521    | 88511    | 3144   | 3.55 | 86700    | 105000  | 86700    | 92800    | 8627   | 9.29  |

---

**Average:** Average of results detected using the ELISA or NLMAGS (n=3). **SD:** Standard deviation of results detected using the ELISA or NLMAGS (n=3). **(CV, Coefficient of Variation) = (SD/ Average)\*100%.**

---
